# Supplementary material
Source: Research Square preprint supplement (doi:10.21203/rs.3.rs-9594174/v1)
Supplement: Supplementary file 1 [file 5f460ac4eba3f1f7cf83fc61.docx]

**Long-term quality of life trajectories in Fibrous Dysplasia and McCune-Albright syndrome**

Rohit Vijjhalwar1,2, Franz Clemeno1, Melanie A Legrand1, Rafael Pinedo-Villanueva1,3, Muhammad Kassim Javaid1,3

1Nuffield Department of Orthopaedics, Rheumatology and Musculoskeletal Sciences, University of Oxford, Oxford, United Kingdom

2University Hospitals Southampton NHS Foundation Trust

3NIHR Oxford Biomedical Research Centre

**Supplementary Material**

Supplementary Tables and Figures

**Supplementary Table S1** Longitudinal EQ-5D change stratified by follow-up duration

| **Dimension** | **All patients estimate** | **≥5 Years estimate** | **≥10 Years estimate** |
| --- | --- | --- | --- |
| Mobility | +0.029*** | +0.030*** | 0.026 |
| Self-care | +0.027*** | +0.026*** | -0.006 |
| Usual Activities | 0.015 | 0.015 | -0.002 |
| Pain/Discomfort | 0.002 | 0.004 | -0.002 |
| Anxiety/Depression | +0.029** | +0.027** | 0.022 |
| VAS Score | -0.464* | -0.458* | -0.073 |

Annual change estimates for EQ-5D domains and VAS stratified by overall cohort, participants with ≥5 years of follow-up, and participants with ≥10 years of follow-up. *******p<0.001**, ****p<0.01, *****p<0.05.

**Supplementary Figure S2** Assessment of reporting frequency bias using EQ-5D VAS scores


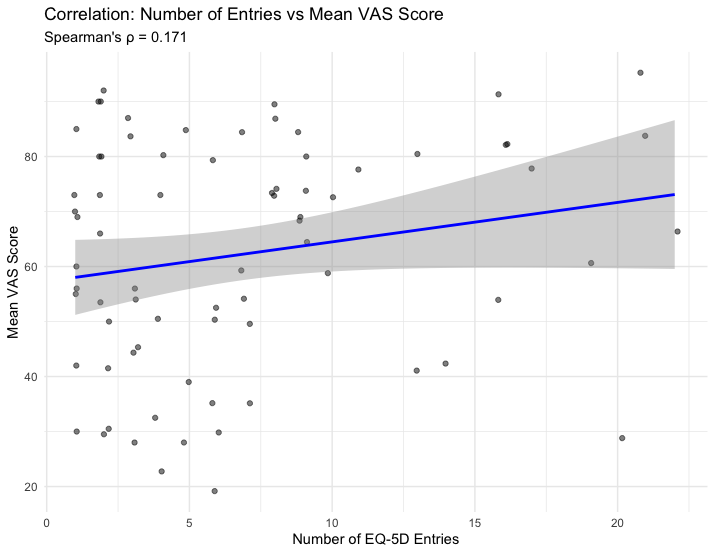


Relationship between the number of EQ-5D observations per participant and mean EQ-5D visual analogue scale (VAS) score. Each point represents an individual participant and there is a fitted regression line with 95% confidence interval.

**Supplementary Table S3** Correlation between reporting frequency and EQ-5D domain scores

| **Dimension** | **Spearman ρ** | **P value** |
| --- | --- | --- |
| Mobility | -0.226 | 0.0524 |
| Self-care | -0.103 | 0.3818 |
| Usual Activities | -0.178 | 0.1283 |
| Pain/Discomfort | -0.182 | 0.1204 |
| Anxiety/Depression | -0.045 | 0.7048 |
| VAS Score | 0.171 | 0.1445 |

Spearman correlation coefficients assessing the association between the number of EQ-5D entries per participant and mean EQ-5D domain scores and VAS.

**Supplementary Figure S4** Gaussian mixture model representation of EQ-5D index trajectory clusters

Scatter plot of baseline versus follow-up EQ-5D index scores coloured by Gaussian mixture model (GMM) cluster assignment. Elliptical 95% confidence ellipses and cluster centroids are shown, demonstrating non-spherical cluster structure and directional trajectories. The two-component GMM solution was selected based on Bayesian Information Criterion.

**Supplementary Table S5** Agreement between K-means and Gaussian mixture model cluster assignments

| **Metric** | **Value** |
| --- | --- |
| Raw agreement | 0.892 |
| Adjusted rand index | 0.609 |
| Classification uncertainty | 0.069 |
| High uncertainty patients | 6 (9.2%) |

Comparison of cluster assignments derived from K-means and Gaussian mixture modelling for baseline-to-follow-up EQ-5D index change.

**Supplementary Figure S6** Classification uncertainty for Gaussian mixture model cluster membership

Distribution of classification uncertainty for Gaussian mixture model cluster assignments plotted against baseline and follow-up EQ-5D index scores.
